# Supplementary material for: White matter disconnectivity fingerprints causally linked to dissociated forms of alexia
Source: PubMed Central journal article supplement (PMC8688436; doi:10.1038/s42003-021-02943-z), 2021-12-20
Supplement: 42003_2021_2943_MOESM2_ESM.pdf [file 42003_2021_2943_MOESM2_ESM.pdf]

## Supplementary information

### **White matter disconnectivity fingerprints causally linked to dissociated forms of alexia**

Sam Ng,<sup>1,2\*</sup> Sylvie Moritz-Gasser,<sup>1,2,3</sup> Anne-Laure Lemaitre,<sup>1,2</sup> Hugues Duffau<sup>1,2</sup> and Guillaume Herbet<sup>1,2,3</sup>

<sup>1</sup>Department of Neurosurgery, Gui de Chauliac Hospital, Montpellier University Medical Center, Montpellier, France

<sup>2</sup>Institut de Génomique Fonctionnelle, Université de Montpellier, CNRS, INSERM, Montpellier, France

<sup>3</sup>Department of Speech-Language Pathology, University of Montpellier, Montpellier, France

\*Corresponding author:

Sam Ng, MD

s-ng@chu-montpellier.fr

Summary (order in which they appear in the main text):

**Supplementary Figure 1:** Spatial distribution of subcortical stimulation sites (n=72).

**Supplementary Table 1:** Montreal Neurological Institute coordinates (reading disorders)

**Supplementary Table 2:** Montreal Neurological Institute coordinates (speech disorders)

**Supplementary Figure 2:** Tract-level analyses. Distribution of “disconnected” streamlines by VOI size.

**Supplementary Figure 3:** Tract-level analyses. Distribution of “disconnected” streamlines by angular threshold.

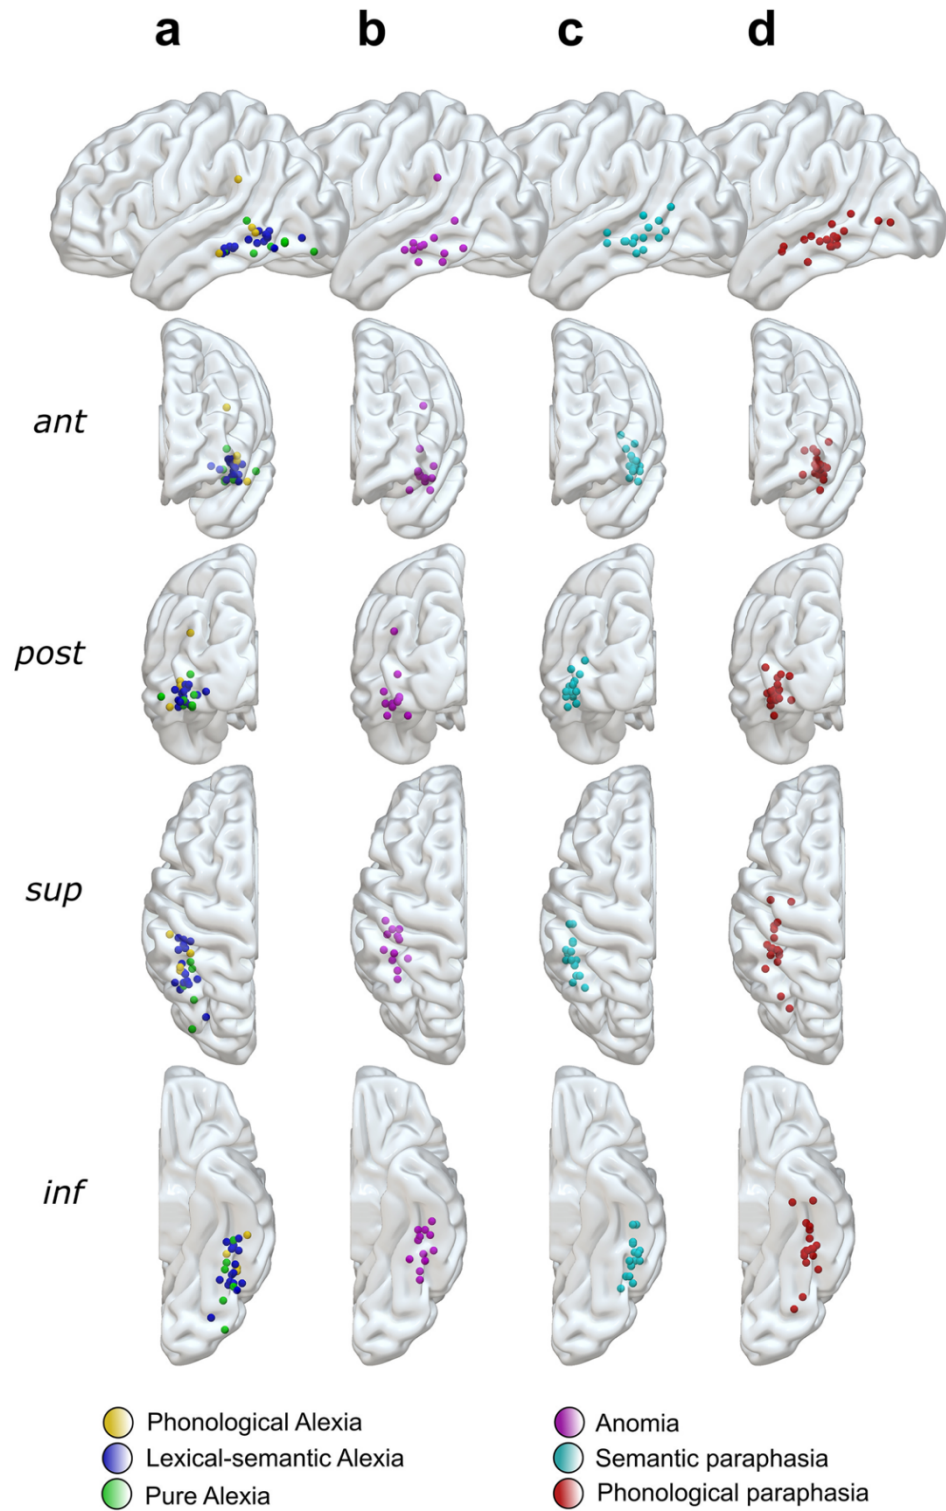

**Supplementary Figure 1:** Spatial distribution of subcortical stimulation sites (n=72). **(a)** Stimulations eliciting alexia (n=27). **(b)** Stimulations eliciting anomia (n=12). **(c)** Stimulations eliciting semantic paraphasia (n=18). **(d)** Stimulations eliciting phonological paraphasia (n=15).

**Supplementary Table 1:** Montreal Neurological Institute (MNI) coordinates (reading disorders)

| Stimulations    | X<br>coordinate | Y<br>coordinate | Z<br>coordinate |
|-----------------|-----------------|-----------------|-----------------|
| <b>Ph-A</b>     |                 |                 |                 |
| S1              | -46             | -48             | 0               |
| S2              | -46             | -50             | -3              |
| S3              | -40             | -40             | 28              |
| S4              | -52             | -29             | -15             |
| <b>Ls-A</b>     |                 |                 |                 |
| S1              | -45             | -46             | -7              |
| S2              | -49             | -57             | -5              |
| S3              | -41             | -58             | -2              |
| S4              | -44             | -57             | -6              |
| S5 <sup>a</sup> | -31             | -77             | -6              |
| S6              | -44             | -51             | -9              |
| S6              | -36             | -55             | -8              |
| S8              | -47             | -31             | -15             |
| S9              | -43             | -37             | -12             |
| S10             | -44             | -32             | -12             |
| S11             | -42             | -56             | -4              |
| S12             | -47             | -38             | -11             |
| S13             | -40             | -33             | -14             |
| S14             | -43             | -52             | -2              |
| S15             | -44             | -35             | -11             |
| S16             | -46             | -61             | -12             |
| <b>Pu-A</b>     |                 |                 |                 |
| S1              | -40             | -45             | 4               |
| S2 <sup>b</sup> | -57             | -67             | -9              |
| S3 <sup>b</sup> | -38             | -67             | -8              |
| S4a             | -39             | -84             | -14             |
| S5              | -44             | -32             | -14             |
| S6              | -44             | -59             | -11             |
| S7              | -39             | -49             | -15             |

Ph-A: phonological alexia, Ls-A: lexical-semantic alexia, Pu-A: Pure alexia

<sup>a</sup> Ls-A-S5 and Pu-A-S4 were recorded in the same patient

<sup>b</sup> Pu-A-S2 and Pu-A-S3 were recorded in the same patient

**Supplementary Table 2: MNI coordinates (speech disorders)**

| Stimulations | X<br>coordinate | Y<br>coordinate | Z<br>coordinate |
|--------------|-----------------|-----------------|-----------------|
| <b>Ph-P</b>  |                 |                 |                 |
| S1           | -48             | -47             | 0               |
| S2           | -50             | -44             | 7               |
| S3           | -53             | -44             | -6              |
| S4           | -47             | -53             | -6              |
| S5           | -42             | -60             | 12              |
| S6           | -52             | -40             | -15             |
| S7           | -45             | -53             | 4               |
| S8           | -49             | -23             | -9              |
| S9           | -49             | -34             | -8              |
| S10          | -53             | -38             | -9              |
| S11          | -49             | -33             | -8              |
| S12          | -49             | -57             | -2              |
| S13          | -51             | -23             | -3              |
| S14          | -50             | -39             | -6              |
| S15          | -47             | -44             | -13             |
| <b>Se-P</b>  |                 |                 |                 |
| S1           | -47             | -49             | 8               |
| S2           | -46             | -35             | -7              |
| S3           | -43             | -37             | -8              |
| S4           | -39             | -41             | -10             |
| S5           | -44             | -41             | -6              |
| S6           | -33             | -72             | 3               |
| S6           | -39             | -39             | -5              |
| S8           | -42             | -24             | -20             |
| S9           | -42             | -26             | -5              |
| S10          | -38             | -65             | 4               |
| S11          | -41             | -38             | -11             |
| S12          | -32             | -10             | -11             |
| S13          | -40             | -45             | -2              |
| S14          | -44             | -9              | -14             |
| S15          | -42             | -31             | -8              |
| S16          | -40             | -38             | 2               |
| S17          | -40             | -22             | -7              |
| S18          | -44             | -37             | -11             |
| <b>An</b>    |                 |                 |                 |
| S1           | -41             | -55             | -12             |
| S2           | -44             | -26             | -13             |
| S3           | -48             | -21             | -13             |
| S4           | -35             | -43             | -20             |
| S5           | -43             | -40             | 29              |
| S6           | -49             | -38             | -6              |
| S7           | -41             | -30             | -11             |
| S8           | -41             | -50             | 4               |
| S9           | -40             | -26             | -9              |
| S10          | -47             | -29             | -20             |
| S11          | -44             | -44             | -15             |
| S12          | -40             | -32             | -10             |

Ph-P: phonological paraphasia, Se-P: semantic paraphasia, An: anomia

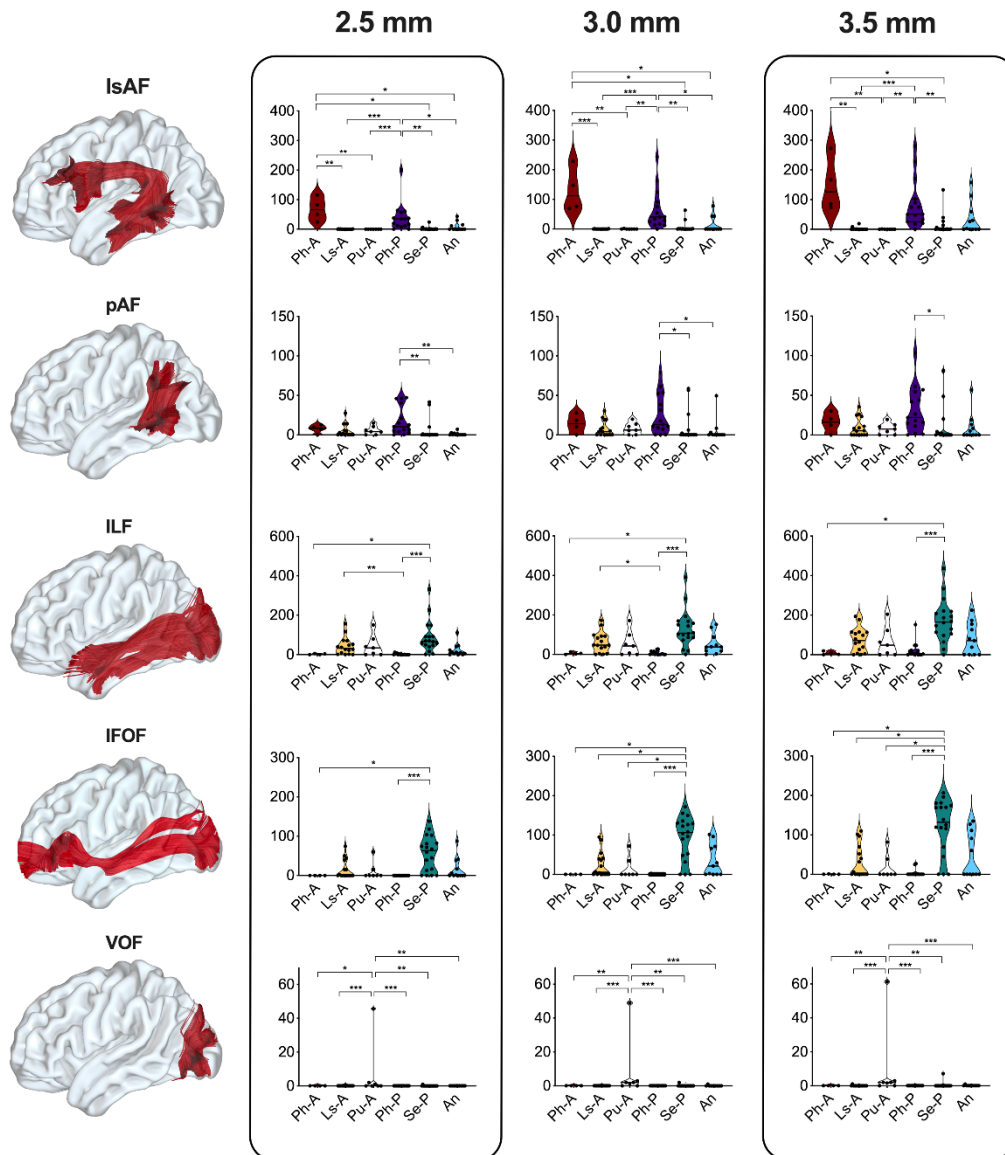

**Supplementary figure 2: Tract-level analyses. Distribution of “disconnected” streamlines by VOI size.**

Main white matter tracts (IsAF: long segment of the arcuate fasciculus, pAF: posterior segment of the arcuate fasciculus, ILF: inferior longitudinal fasciculus, IFOF: inferior fronto-occipital fasciculus, VOF: vertical occipital fasciculus) according to the HCP-1065 white matter tractography atlas and number of disconnected fibers in each form of alexia (Ph-A: phonological alexia, Ls-A: lexical-semantic alexia, Pu-A: pure alexia) and speech disorders (Ph-P: phonological paraphasia, Se-P: semantic paraphasia, An: anomia).

The total number of generated fibers using 2.5-mm volumes of interest (left), 3.0-mm volumes of interest (middle) and 3.5-mm volumes of interest were collected and projected into the MNI space along with the HCP population-averaged atlas of the human connectome using DSI studio software.

Individual values are presented as dots. Horizontal lines represent the median.

Kruskall-Wallis test and Dunn’s test were performed. P-values were adjusted for multiple comparisons.

\*  $p < 0.05$ ; \*\*  $p < 0.01$ ; \*\*\*  $p < 0.001$

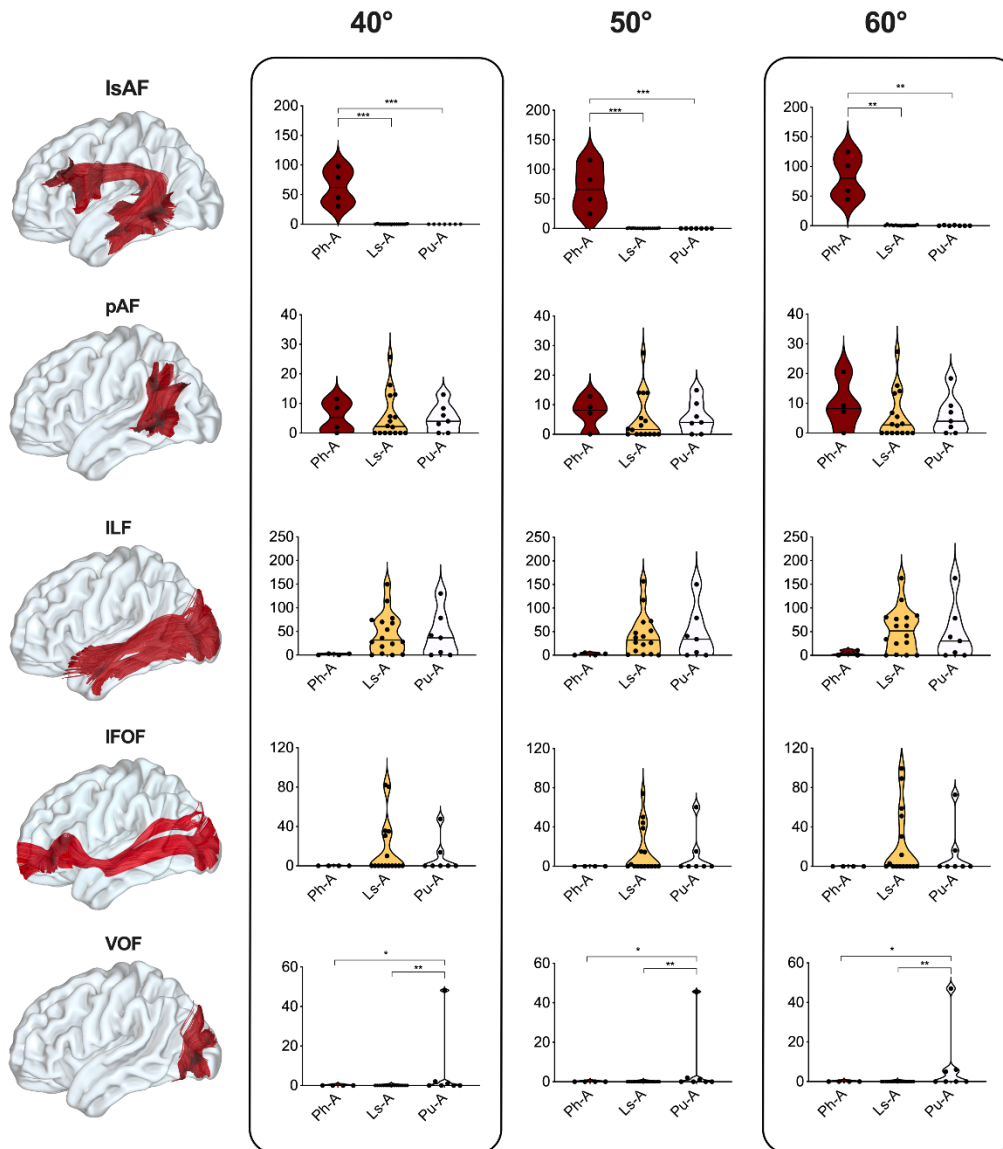

**Supplementary figure 3: Tract-level analyses. Distribution of “disconnected” streamlines by angular threshold.**

Main white matter tracts (IsAF: long segment of the arcuate fasciculus, pAF: posterior segment of the arcuate fasciculus, ILF: inferior longitudinal fasciculus, IFOF: inferior fronto-occipital fasciculus, VOF: vertical occipital fasciculus) according to the HCP-1065 white matter tractography atlas and number of disconnected fibers in each form of alexia (Ph-A: phonological alexia, Ls-A: lexical-semantic alexia, Pu-A: pure alexia) and speech disorders (Ph-P: phonological paraphasia, Se-P: semantic paraphasia, An: anomia). The total number of generated streamlines using a maximum angular threshold of 40° (left), 50° (middle) and 60° (right) were collected and projected into the MNI space along with the HCP population-averaged atlas of the human connectome using DSI studio software.

Individual values are presented as dots. Horizontal lines represent the median values.

Kruskal-Wallis tests were used to performed group comparisons. P-values were adjusted with the Dunn’s test for multiple comparisons. \* p < 0.05; \*\* p < 0.01; \*\*\* p < 0.001
