# Supplementary material for: White matter disconnectivity fingerprints causally linked to dissociated forms of alexia
Source: PubMed Central journal article supplement (PMC8688436; doi:10.1038/s42003-021-02943-z), 2021-12-20
Supplement: 42003_2021_2943_MOESM3_ESM.pdf [file 42003_2021_2943_MOESM3_ESM.pdf]

## Description of Additional Supplementary Files

**File name:** Supplementary Data 1

**Description:** Summed disconnection matrices in Ph-A (n=4), Ls-A (n=16) and Pu-A (n=7).

**File name:** Supplementary Data 2

**Description:** Individual streamline count within the main white matter pathways by alexia subtype.
